# Supplementary material for: Conventional dendritic cell 2 links the genetic causal association from allergic asthma to COVID-19: a Mendelian randomization and transcriptomic study
Source: Springer Nature journal article supplement (doi:10.1186/s40537-024-00881-1), 2024-02-04
Supplement: 40537_2024_881_MOESM1_ESM.pdf [file 40537_2024_881_MOESM1_ESM.pdf]

Additional file 1: supplementary figures

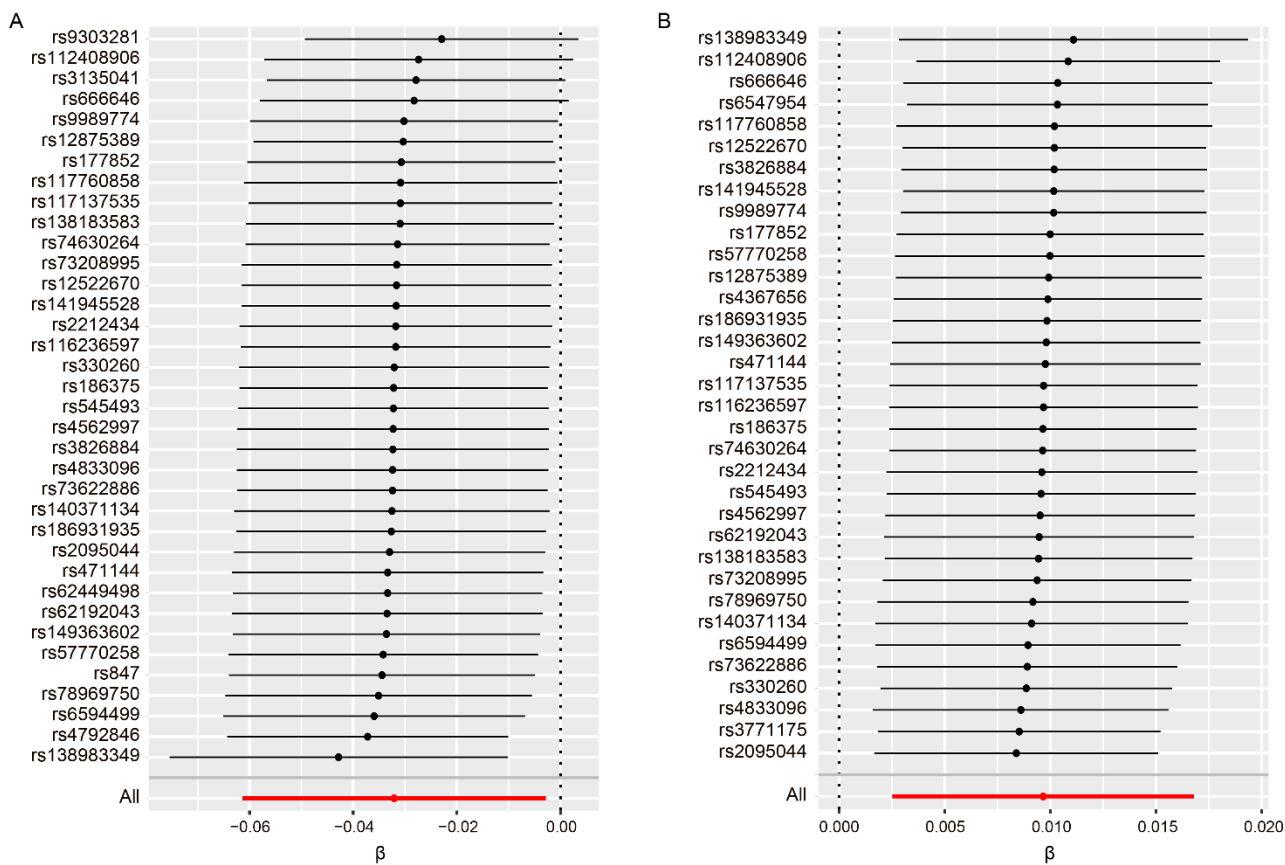

Fig. S1. Leave-one-out analysis for AA on COVID-19 hospitalization (A) and AA on white cell count (B).

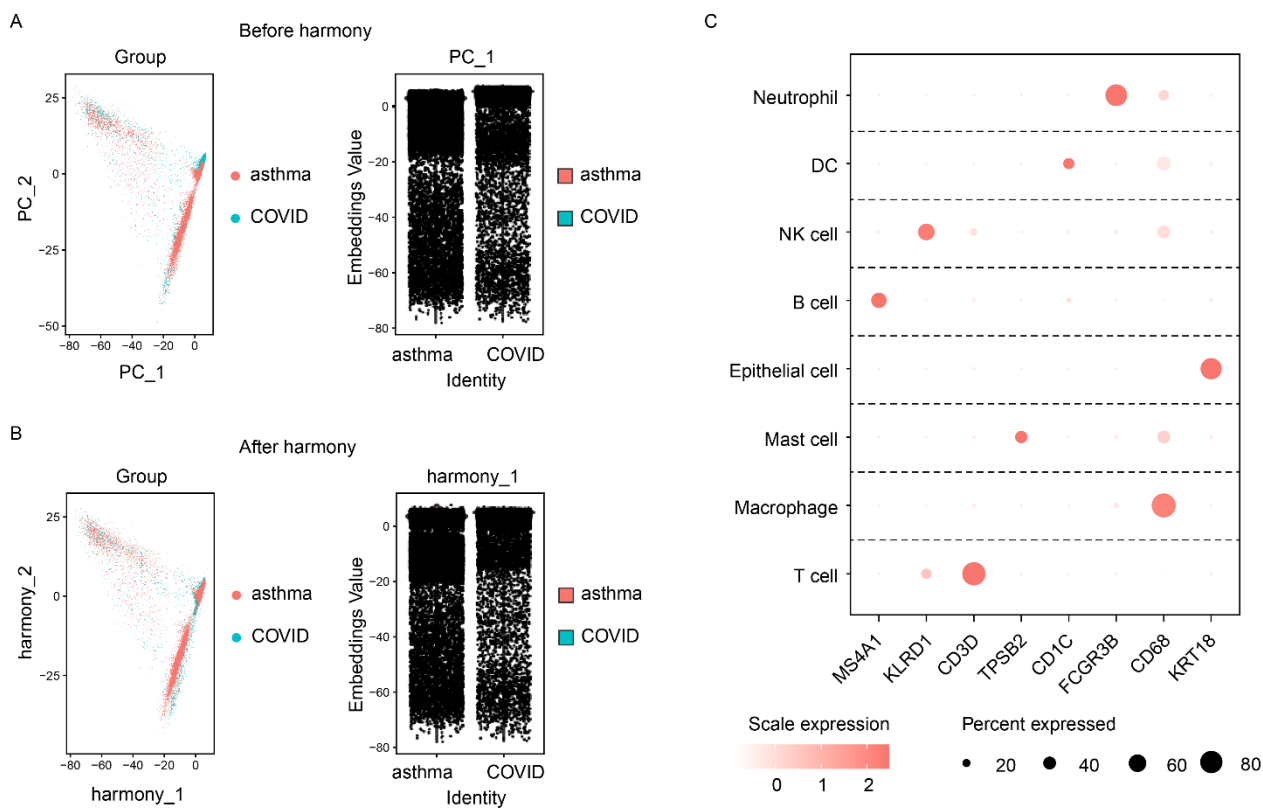

Fig. S2. (A, B) The integration of AA and COVID-19 datasets. (C) Bubble plot shows marker genes for cell type annotation.

A

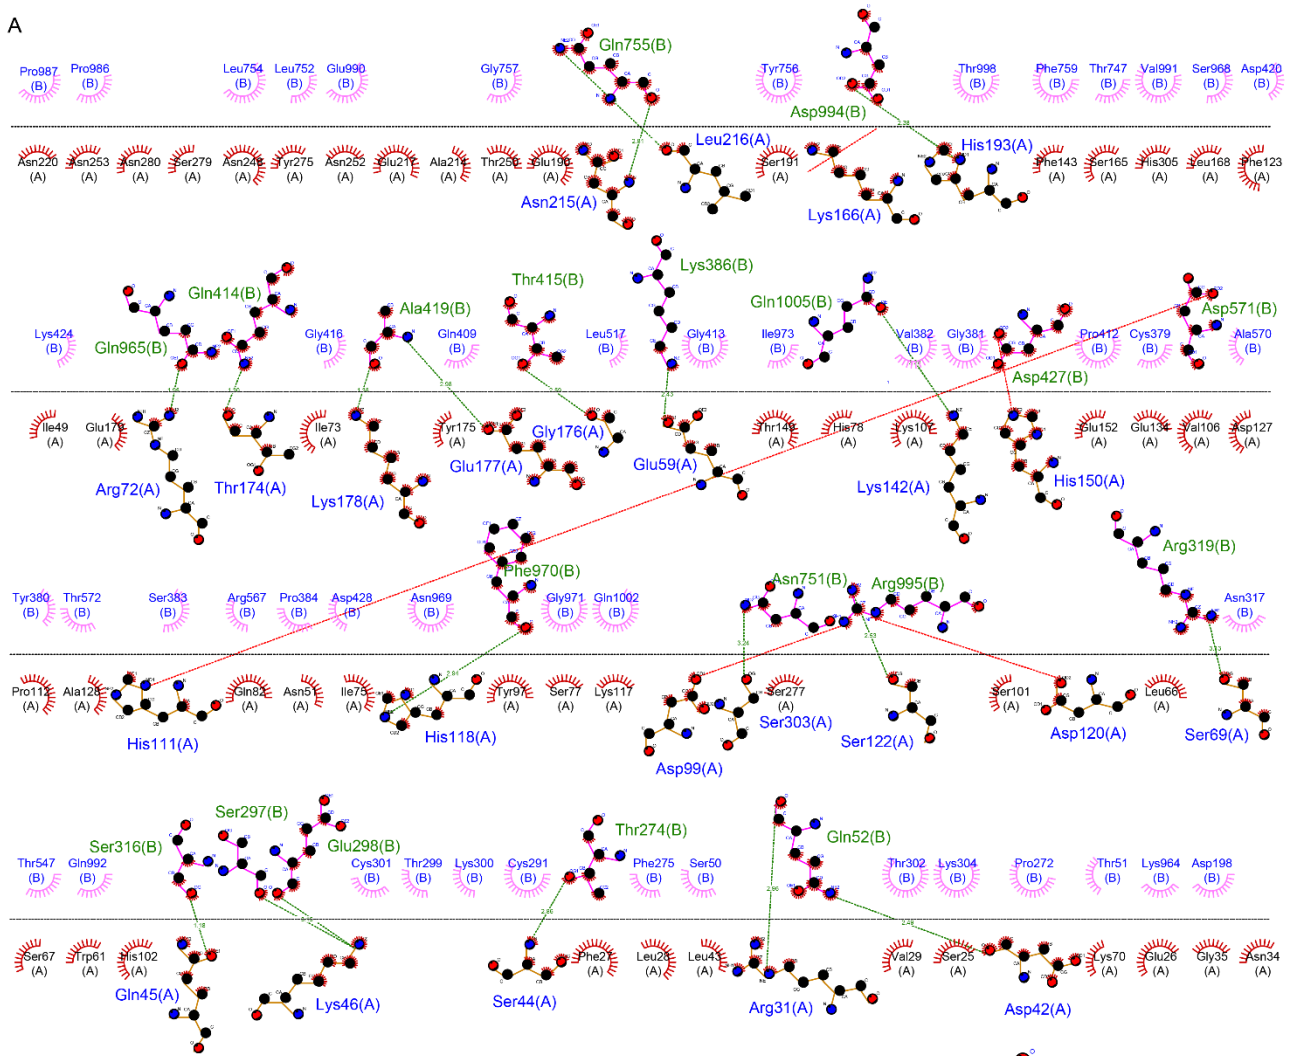

B

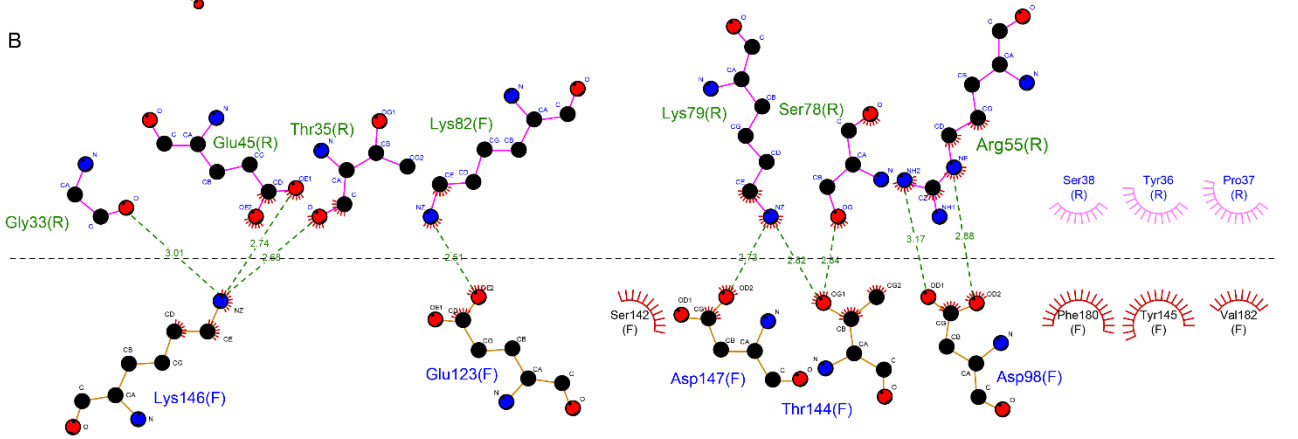

Fig. S3. (A) The 2D protein docking graph shows the interactive forces and distances between TLR1 and spike protein. (B) The 2D protein docking graph shows the interactive forces and distances between TNFSF4 and TNFRSF4.
